# Supplementary material for: Influenza A H1 and H3 Transmembrane Domains Interact Differently with Each Other and with Surrounding Membrane Lipids
Source: PubMed Central journal article supplement (PMC7765950; doi:10.3390/v12121461), 2020-12-17
Supplement: viruses-12-01461-s001.pdf [file viruses-12-01461-s001.pdf]

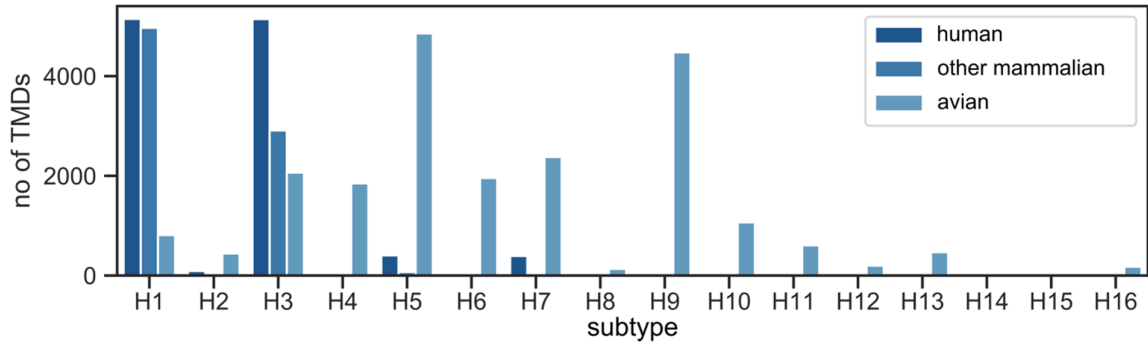

**Figure S1. Numeric characteristics of the TMDs analyzed.** Bar plots show the total number of TMD records from the OpenFlu database according to the subtype and host.

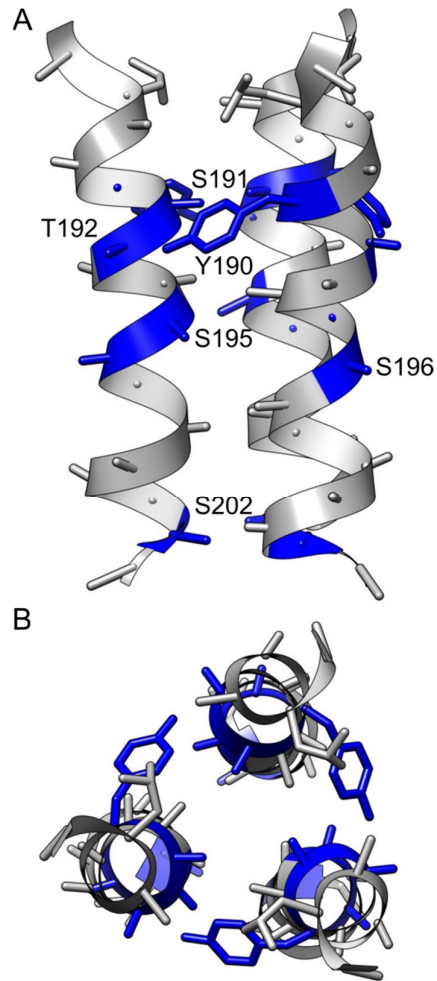

**Figure S2. Structure of the H1 TMD trimer.** A) side and B) top views. Polar residues are shown in blue (numbering according to PDB ID: 6HJQ). Side chain atoms are not completely resolved. The structure of the H3 TMD trimer is not available.

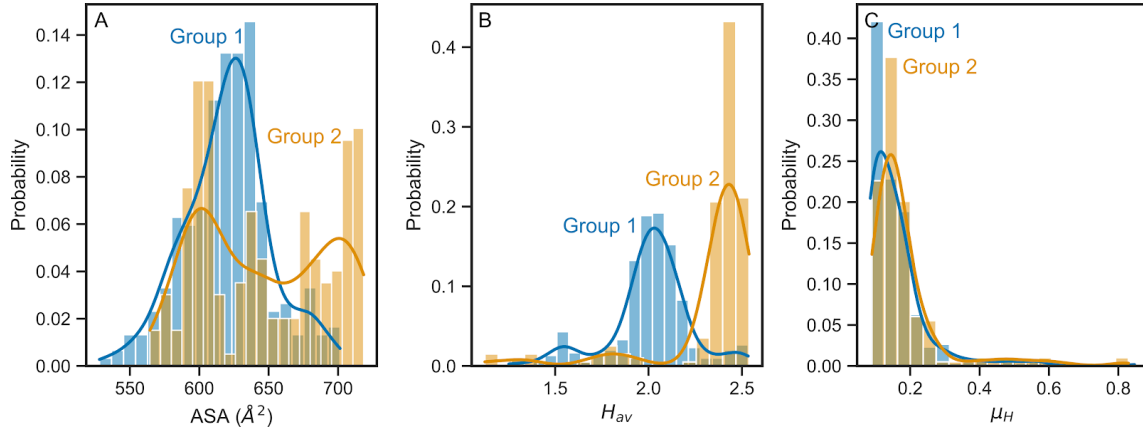

**Figure S3.** Distributions of A) ASA, B)  $H_{av}$  and C)  $\mu_H$  values calculated for the dataset of TMDs (all hosts combined) with homology purged to 40% sequence identity. The differences between two phylogenetic groups are statistically significant ( $p < 0.001$ , two sided Mann-Whitney U test).

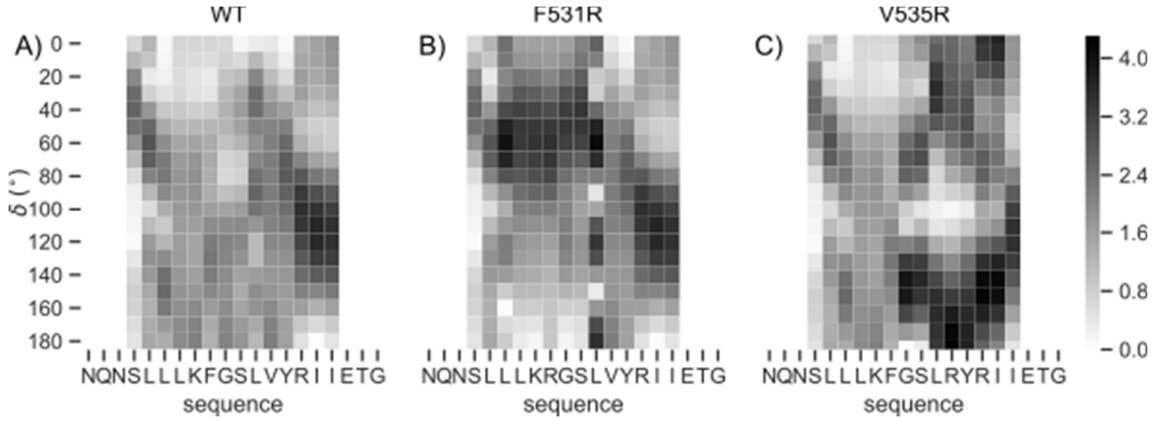

**Figure S4.** Hydrophobic moment maps for the pre-TMD region of the A) wild-type Ire1 protein [61] and F531R and V535R mutants, B) and C) respectively. In molecular dynamics simulations, both mutants show a tilted pre-TMD regions with respect to the TMD helix, in contrast to the wild-type protein.

**Table S1.** Total number of TMD sequences.

| Serotype | Host            | No of TMDs |
|----------|-----------------|------------|
| H1       | human           | 5148       |
| H1       | other mammalian | 4969       |
| H1       | avian           | 812        |
| H2       | human           | 91         |
| H2       | other mammalian | 3          |
| H2       | avian           | 442        |
| H3       | human           | 5145       |
| H3       | other mammalian | 2911       |
| H3       | avian           | 2066       |
| H4       | human           | 0          |
| H4       | other mammalian | 9          |
| H4       | avian           | 1849       |
| H5       | human           | 403        |
| H5       | other mammalian | 70         |
| H5       | avian           | 4857       |
| H6       | human           | 0          |
| H6       | other mammalian | 3          |
| H6       | avian           | 1957       |
| H7       | human           | 392        |
| H7       | other mammalian | 22         |
| H7       | avian           | 2378       |

---

|     |                 |      |
|-----|-----------------|------|
| H8  | human           | 0    |
| H8  | other mammalian | 0    |
| H8  | avian           | 134  |
| H9  | human           | 24   |
| H9  | other mammalian | 36   |
| H9  | avian           | 4477 |
| H10 | human           | 6    |
| H10 | other mammalian | 2    |
| H10 | avian           | 1066 |
| H11 | human           | 0    |
| H11 | other mammalian | 1    |
| H11 | avian           | 606  |
| H12 | human           | 0    |
| H12 | other mammalian | 0    |
| H12 | avian           | 199  |
| H13 | human           | 0    |
| H13 | other mammalian | 2    |
| H13 | avian           | 468  |
| H14 | human           | 0    |
| H14 | other mammalian | 0    |
| H14 | avian           | 28   |
| H15 | human           | 0    |
| H15 | other mammalian | 0    |
| H15 | avian           | 18   |
| H16 | human           | 0    |
| H16 | other mammalian | 0    |
| H16 | avian           | 177  |

---

**Table S2.** TMD sequences with the highest frequency of occurrence according to the host and subtype.

| <b>Serotype</b> | <b>Host</b>     | <b>Occurrence (%)</b> | <b>Sequence</b>        |
|-----------------|-----------------|-----------------------|------------------------|
| H1              | human           | 63.1                  | ILAIYSTVASSLVLVVSLGAI  |
| H1              | human           | 34.9                  | ILAIYSTVASSLVLLVSLGAI  |
| H1              | human           | 0.3                   | MGVYQILAIYSTVASSLVLLV  |
| H1              | other mammalian | 38.9                  | ILAIYSTVASSLVLLVSLGAI  |
| H1              | other mammalian | 36.3                  | ILAIYSTVASSLVLVVSLGAI  |
| H1              | other mammalian | 3.7                   | ILSIYSTVASSLVLLVSLGAI  |
| H1              | avian           | 85.6                  | ILAIYSTVASSLVLLVSLGAI  |
| H1              | avian           | 6.2                   | ILAIYSTVASSLIWLVSLGAI  |
| H1              | avian           | 1.8                   | ILAIYSTVASSLVLLVSLGAL  |
| H2              | human           | 74.7                  | ILAIYATVAGSLSLAIMMAGI  |
| H2              | human           | 15.4                  | ILAIYATVAGSLSLAIMIAGI  |
| H2              | human           | 8.8                   | ILAIYATVAGSLSLAIMVAGI  |
| H2              | other mammalian | 100.0                 | ILAIYATVAGSLSLAIMIAGI  |
| H2              | avian           | 90.0                  | ILAIYATVAGSLSLAIMIAGI  |
| H2              | avian           | 5.2                   | ILAIYATVAGSLSLAIMMAGI  |
| H2              | avian           | 1.4                   | YATVAGSLSLAIMIAGIFLWM  |
| H3              | human           | 67.1                  | LWISFAISCFLLCVALLGFIM  |
| H3              | human           | 23.5                  | LWISFAISCFLLCVLLGFIM   |
| H3              | human           | 4.9                   | LWISFAISCFLLCIVLLGFIM  |
| H3              | other mammalian | 55.0                  | LWISFAISCFLLCVLLGFIM   |
| H3              | other mammalian | 9.6                   | LWISFAISCFLICVLLGFIM   |
| H3              | other mammalian | 7.8                   | LWISFAISCFLLCVALLGFIM  |
| H3              | avian           | 79.4                  | LWISFAISCFLLCVLLGFIM   |
| H3              | avian           | 8.7                   | LWISFAISCFLLCVILGFIM   |
| H3              | avian           | 3.3                   | ILWISFAISCFLLCVLLGFI   |
| H4              | other mammalian | 66.7                  | ILWISFSISCFLLVALLLAFI  |
| H4              | other mammalian | 22.2                  | ILWFSFSISCFLLVALLLAFI  |
| H4              | other mammalian | 11.1                  | ILWISFSISCFLLVALLLAFV  |
| H5              | avian           | 43.2                  | ILSIYSTVASSLALAIMVAGL  |
| H5              | avian           | 12.5                  | ILSIYSTVASSLALAIMIAGL  |
| H5              | avian           | 11.7                  | ILSIYSTVASSLVLAIMMAGL  |
| H6              | other mammalian | 66.7                  | ILAIYSTVSSSLVVLVGLIMAM |
| H6              | other mammalian | 33.3                  | ILAIYSTVSSSLVVLVGLILAM |
| H7              | human           | 95.4                  | FSFGASCFILLAIVMGLVFIC  |
| H7              | human           | 1.8                   | FSFGASCFILLAIAMGLVFIC  |
| H7              | human           | 1.3                   | FSFGASCFLLLAIAMGLVFIC  |
| H7              | other mammalian | 50.0                  | IILWFSGASCFLFLAIAMVL   |
| H7              | other mammalian | 18.2                  | FSFGASCFLLLAIAMGLVFIC  |
| H7              | other mammalian | 9.1                   | FSFGASCFLFLAIAMGLVFIC  |
| H7              | avian           | 35.5                  | FSFGASCFLLLAIAMGLVFIC  |
| H7              | avian           | 28.6                  | FSFGASCFILLAIAMGLVFIC  |
| H7              | avian           | 23.8                  | FSFGASCFILLAIVMGLVFIC  |
| H8              | avian           | 95.5                  | IYSTVAASLCLAILIAGGLIIL |
| H8              | avian           | 1.5                   | IYSTVAASLCLAILVAGGLIIL |
| H8              | avian           | 0.7                   | STVAASLCLAILIAGGLILGM  |
| H9              | human           | 62.5                  | IYSTVASSLVIAMGFAAFLFW  |
| H9              | human           | 29.2                  | IYSTVASSLVLAMGFAAFLFW  |
| H9              | human           | 4.2                   | STVASSLMLAIGFAAFMFVVM  |
| H9              | other mammalian | 80.6                  | IYSTVASSLVIAMGFAAFLFW  |
| H9              | other mammalian | 11.1                  | IYSTVASSLVVAMGFAAFLFW  |
| H9              | other mammalian | 5.6                   | IYSTVASSLVLAMGFAAFLFW  |
| H9              | avian           | 73.2                  | IYSTVASSLVIAMGFAAFLFW  |
| H9              | avian           | 12.0                  | IYSTVASSLVLAMGFAAFLFW  |
| H9              | avian           | 1.5                   | IYSTVASSLVVAMGFAAFLFW  |
| H10             | human           | 100.0                 | FSFGASCFVLLAVVMGLVFFFC |
| H10             | other mammalian | 50.0                  | FSFGASCFVLLAAVMGLVFFFC |
| H10             | other mammalian | 50.0                  | FSFGASCFVLLAVVMGLVFFFC |
| H10             | avian           | 56.1                  | FSFGASCFVLLAVIMGLVFFFC |
| H10             | avian           | 34.4                  | FSFGASCFVLLAVVMGLVFFFC |

|     |                 |       |                        |
|-----|-----------------|-------|------------------------|
| H10 | avian           | 1.5   | FSFGASC FVLLAVVMGLFFFC |
| H11 | other mammalian | 100.0 | IYSCIASSLVLAALIMGFMF   |
| H11 | avian           | 36.0  | IYSCIASSLVLAALIMGFILW  |
| H11 | avian           | 29.9  | IYSCIASSLVLAALIMGFIFW  |
| H11 | avian           | 26.9  | IYSCIASSLVLAALIMGFILW  |
| H12 | avian           | 88.4  | SSVASSLVLLMIIGGFIFGC   |
| H12 | avian           | 11.6  | IYSSVASSLVLLMIIGGFIF   |
| H13 | other mammalian | 100.0 | IYSCIASSVVLVGLILAFIMW  |
| H13 | avian           | 66.5  | IYSCIASSIVLVGLILAFIMW  |
| H13 | avian           | 15.0  | IYSCIASSVVLVGLILSFIMW  |
| H13 | avian           | 11.8  | IYSCIASSVVLVGLILAFIMW  |
| H14 | avian           | 71.4  | IILWISFMSCFVFVALILGF   |
| H14 | avian           | 21.4  | ILWISFMSCFVFVALILGFV   |
| H14 | avian           | 3.6   | LWISFMSCFVFVALILGFVF   |
| H15 | avian           | 44.4  | WFSFGASCVMLLAIAMGLIFM  |
| H15 | avian           | 44.4  | WFSFGASC FMLLAIAMGLIFM |
| H15 | avian           | 11.1  | WFSFGASC FVLLAIAMGLIFM |
| H16 | avian           | 36.7  | IYSCIASSVVLVGLILAFILW  |
| H16 | avian           | 29.9  | IYSCIASSTVLVGLILAFIMW  |
| H16 | avian           | 9.0   | IYSCIASSIVLVGLILAFIMW  |

**Table S3.** Pre-TMD sequences with the highest frequency of occurrence according to the host and subtype.

| <b>Serotype</b> | <b>Host</b>     | <b>Occurrence (%)</b> | <b>Sequence</b> |
|-----------------|-----------------|-----------------------|-----------------|
| H1              | human           | 63.3                  | ESTRIYQ         |
| H1              | avian           | 91.5                  | ESMGVYQ         |
| H1              | other mammalian | 43.7                  | ESTRIYQ         |
| H2              | human           | 91.2                  | SSMGVYQ         |
| H2              | avian           | 86.2                  | SNMGVYQ         |
| H2              | other mammalian | 100.0                 | SNMGVYQ         |
| H3              | human           | 95.9                  | SGYKDWI         |
| H3              | avian           | 91.5                  | SGYKDWI         |
| H3              | other mammalian | 44.7                  | SGYKDWI         |
| H4              | avian           | 91.8                  | TQGYKDI         |
| H4              | other mammalian | 66.7                  | TQGYKDI         |
| H5              | human           | 43.9                  | ESIGTYQ         |
| H5              | avian           | 42.7                  | ESIGTYQ         |
| H5              | other mammalian | 57.1                  | ESIGTYQ         |
| H6              | avian           | 52.6                  | ENLGVYQ         |
| H6              | other mammalian | 33.3                  | ENLGVYQ         |
| H7              | human           | 96.9                  | YKDVILW         |
| H7              | avian           | 50.4                  | YKDVILW         |
| H7              | other mammalian | 54.5                  | LSSGYKD         |
| H8              | avian           | 94.8                  | TTYKILS         |
| H9              | human           | 91.7                  | GTYKILT         |
| H9              | avian           | 85.8                  | GTYKILT         |
| H9              | other mammalian | 75.0                  | GTYKILT         |
| H10             | human           | 100.0                 | YKDIILW         |
| H10             | avian           | 58.0                  | YKDVILW         |
| H10             | other mammalian | 100.0                 | YKDIILW         |
| H11             | avian           | 49.2                  | NVYKILS         |
| H11             | other mammalian | 100.0                 | NVYKILS         |
| H12             | avian           | 88.4                  | YKILSIY         |
| H13             | avian           | 40.5                  | NVYKALS         |
| H13             | other mammalian | 100.0                 | NVYKALS         |
| H14             | avian           | 46.4                  | LTMGYKD         |
| H15             | avian           | 50.0                  | GYKDVIL         |
| H16             | avian           | 82.5                  | NVYKILS         |
